# Supplementary material for: Morin-VitaminE-β-CyclodextrinInclusionComplexLoadedChitosanNanoparticles (M-Vit.E-CD-CSNPs) Ameliorate Arsenic-Induced Hepatotoxicityina Murine Model
Source: MDPI journal article supplement (doi:10.3390/molecules27185819), 2022-09-08
Supplement: s1 [file s1]

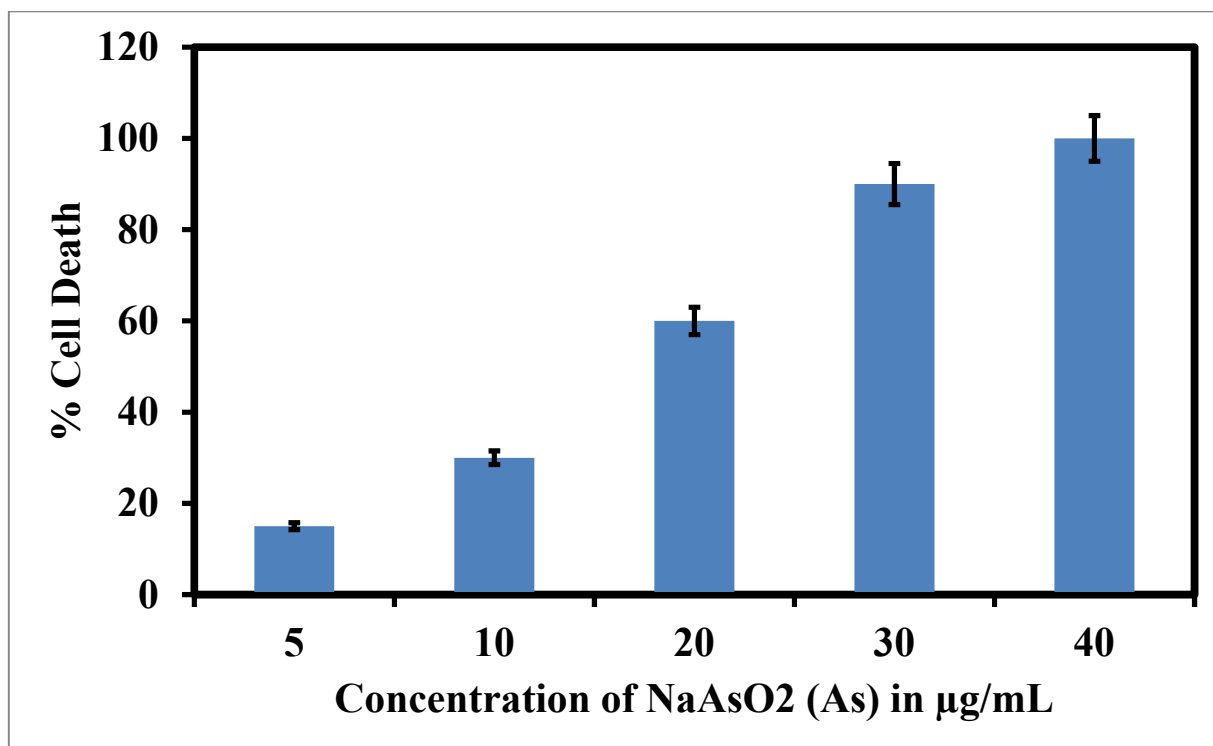

Figure S1: HepG2 (human hepatocellular carcinoma) cells ( $1 \times 10^6$  cells/mL) were treated with different concentrations of sodium arsenite ranging from 5 to 40 µg/mL for 24 h. % cell death values were calculated from an MTT assay. Results presented here are one of the three representative experiments  $\pm$ S.D.

Figure S2:

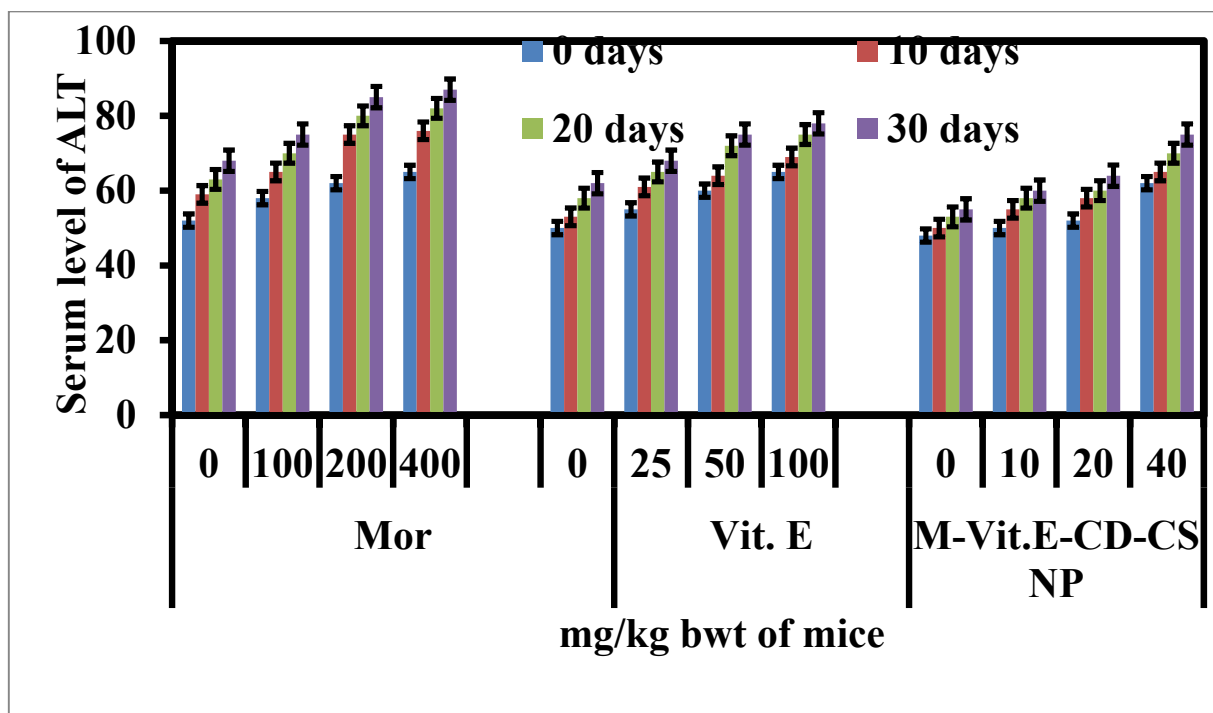

Figure S3:

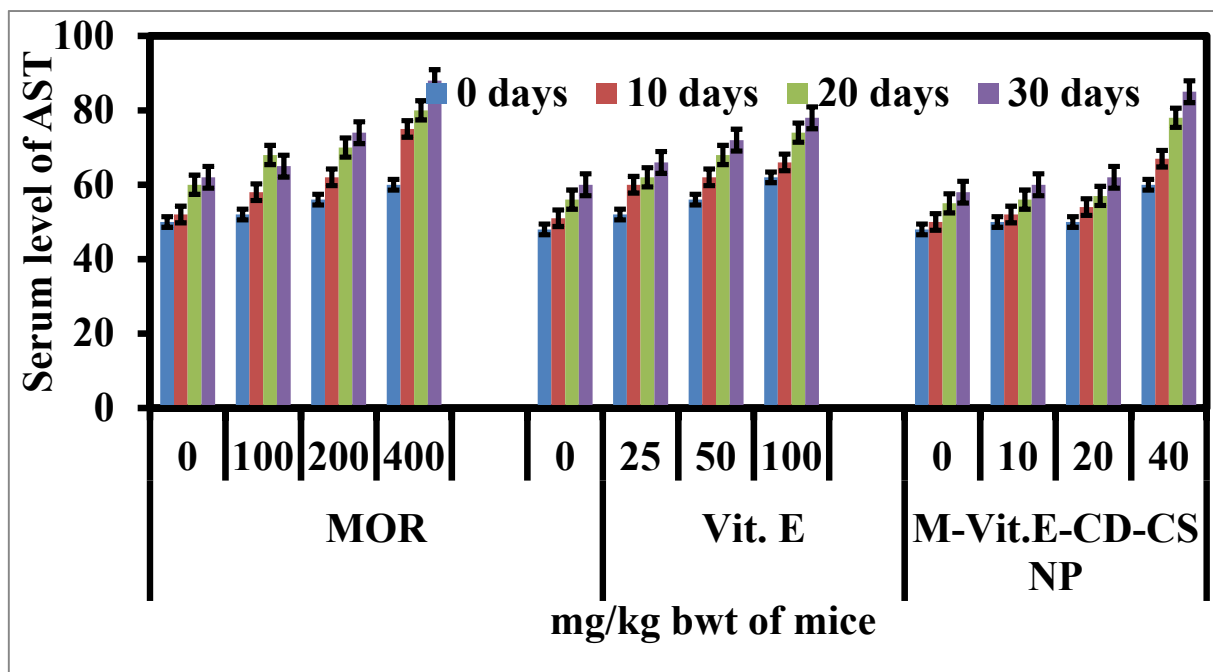

Figure S2 and S3: Effect of Morin (MOR), vitamin E and M-Vit.E-CD-CS NPs on liver function markers (ALT and AST). Different dosage of Morin (MOR), vitamin E and M-Vit.E-CD-CS NPs

were orally given to the normal BALB/c mice and the serum level of ALT and AST were measured. Data is one of the three representative experiments  $\pm$  SD.

**Table S1: Effect of oral administration of MOR and MCNPs on haematological Parameters**

| <b>Parameters</b>                                            | <b>Control Group</b>              | <b>Arsenic (40 mg/L) treated mice</b> | <b>Arsenic + MOR (200 mg/kg) treated mice</b> | <b>Arsenic + Vitamin E (50 mg/kg) treated mice</b> | <b>Arsenic + M-Vit.E-CD-CS NPs (20 mg/kg)</b> |
|--------------------------------------------------------------|-----------------------------------|---------------------------------------|-----------------------------------------------|----------------------------------------------------|-----------------------------------------------|
| <b>Body weight gain (gm)</b>                                 | <b>0.52 <math>\pm</math> 0.06</b> | <b>0.29 <math>\pm</math> 0.03</b>     | <b>0.45 <math>\pm</math> 0.04</b>             | <b>0.39 <math>\pm</math> 0.02</b>                  | <b>0.49 <math>\pm</math> 0.03</b>             |
| <b>RBC : No. of cells (10<sup>6</sup>/<math>\mu</math>L)</b> | <b>8.1 <math>\pm</math> 0.53</b>  | <b>5.2 <math>\pm</math> 0.35</b>      | <b>6.8 <math>\pm</math> 0.27</b>              | <b>6.1 <math>\pm</math> 0.33</b>                   | <b>7.5 <math>\pm</math> 0.41</b>              |
| <b>WBC : No. of cells (10<sup>3</sup>/<math>\mu</math>L)</b> | <b>12.6 <math>\pm</math> 0.13</b> | <b>16.2 <math>\pm</math> 0.31</b>     | <b>15.1 <math>\pm</math> 0.24</b>             | <b>15.8 <math>\pm</math> 0.41</b>                  | <b>13.1 <math>\pm</math> 0.22</b>             |
| <b>Hb (gm/dl)</b>                                            | <b>13.6 <math>\pm</math> 0.38</b> | <b>11.7 <math>\pm</math> 0.23</b>     | <b>12.5 <math>\pm</math> 0.47</b>             | <b>12.1 <math>\pm</math> 0.17</b>                  | <b>12.9 <math>\pm</math> 0.38</b>             |
| <b>PLT (10<sup>3</sup>/<math>\mu</math>L)</b>                | <b>556 <math>\pm</math> 31.2</b>  | <b>412 <math>\pm</math> 28.2</b>      | <b>512 <math>\pm</math> 25.8</b>              | <b>516 <math>\pm</math> 36.2</b>                   | <b>545 <math>\pm</math> 19.7</b>              |
| <b>LDH (U/L)</b>                                             | <b>401 <math>\pm</math> 24.3</b>  | <b>742 <math>\pm</math> 31.3</b>      | <b>495 <math>\pm</math> 14.5</b>              | <b>481 <math>\pm</math> 16.6</b>                   | <b>412 <math>\pm</math> 11.3</b>              |
| <b>Uric acid (mg/dL)</b>                                     | <b>2.61 <math>\pm</math> 0.72</b> | <b>4.73 <math>\pm</math> 0.51</b>     | <b>3.09 <math>\pm</math> 0.34</b>             | <b>3.21 <math>\pm</math> 0.51</b>                  | <b>2.76 <math>\pm</math> 0.42</b>             |
| <b>Creatinine (mg/dL)</b>                                    | <b>0.51 <math>\pm</math> 0.04</b> | <b>2.8 <math>\pm</math> 0.13</b>      | <b>1.7 <math>\pm</math> 0.09</b>              | <b>1.5 <math>\pm</math> 0.06</b>                   | <b>0.61 <math>\pm</math> 0.03</b>             |
| <b>Cholesterol (mg/dL)</b>                                   | <b>145 <math>\pm</math> 7.6</b>   | <b>281 <math>\pm</math> 31.2</b>      | <b>162 <math>\pm</math> 11.2</b>              | <b>173 <math>\pm</math> 16.3</b>                   | <b>151 <math>\pm</math> 4.5</b>               |
| <b>TG (mg/dL)</b>                                            | <b>85.1 <math>\pm</math> 8.2</b>  | <b>163 <math>\pm</math> 12.1</b>      | <b>92.4 <math>\pm</math> 9.1</b>              | <b>104.4 <math>\pm</math> 6.2</b>                  | <b>89.3 <math>\pm</math> 3.8</b>              |
| <b>HDL (mg/dL)</b>                                           | <b>61.8 <math>\pm</math> 2.9</b>  | <b>35.6 <math>\pm</math> 4.1</b>      | <b>45.1 <math>\pm</math> 2.3</b>              | <b>48.4 <math>\pm</math> 3.1</b>                   | <b>55.3 <math>\pm</math> 3.5</b>              |
| <b>LDL (mg/dL)</b>                                           | <b>76.2 <math>\pm</math> 5.7</b>  | <b>165.6 <math>\pm</math> 10.8</b>    | <b>92.5 <math>\pm</math> 6.1</b>              | <b>95.6 <math>\pm</math> 5.3</b>                   | <b>81.1 <math>\pm</math> 4.6</b>              |
| <b>Phospholipid (mg/dL)</b>                                  | <b>45.5 <math>\pm</math> 7.5</b>  | <b>22.1 <math>\pm</math> 4.3</b>      | <b>38.1 <math>\pm</math> 2.9</b>              | <b>35.3 <math>\pm</math> 3.1</b>                   | <b>42.5 <math>\pm</math> 3.1</b>              |

Values are expressed as mean  $\pm$  SEM (n=3). P>0.05 when compared to normal group.

**Table S2: Arsenic deposition in different organ**

| <b>Arsenic concentration in µg/g of tissue in 30 days</b> |                    |                   |                    |                   |                   |                   |
|-----------------------------------------------------------|--------------------|-------------------|--------------------|-------------------|-------------------|-------------------|
|                                                           | <b>Liver</b>       | <b>Kidney</b>     | <b>Cerebellum</b>  | <b>Lung</b>       | <b>Heart</b>      | <b>Skin</b>       |
| <b>Arsenic, 40 mg/L</b>                                   | <b>145.3 ± 5.1</b> | <b>29.8 ± 1.8</b> | <b>12.5± 4.4</b>   | <b>14.6 ± 1.3</b> | <b>12.8 ± 5.6</b> | <b>4.8 ± 2.6</b>  |
| <b>Arsenic + MOR (200 mg/kg)</b>                          | <b>110.4 ± 2.5</b> | <b>18.1 ± 1.4</b> | <b>8.2 ± 2.1</b>   | <b>9.9 ± 1.9</b>  | <b>8.5 ± 2.2</b>  | <b>1.9 ± 0.6</b>  |
| <b>Arsenic + vitamin E (50 mg/kg)</b>                     | <b>95.2 ± 2.4</b>  | <b>15.1 ± 1.6</b> | <b>6.6 ± 1.3</b>   | <b>7.1 ± 1.1</b>  | <b>6.1 ± 0.8</b>  | <b>0.7 ± 0.16</b> |
| <b>Arsenic + M-Vit.E-CD-CS NPs (20 mg/kg)</b>             | <b>41.6 ± 3.3</b>  | <b>3.1 ± 1.2</b>  | <b>0.52 ± 0.07</b> | <b>1.2 ± 0.03</b> | <b>1.5 ± 0.21</b> | <b>0</b>          |

Values are expressed as mean ± SEM (n=3). P>0.05 when compared to normal group.
